# Supplementary material for: Fluorescent magnetic nanosensors for Zn2+ and CN− in aqueous solution prepared from adamantane-modified fluorescein and β-cyclodextrin-modified Fe3O4@SiO2via host–guest interactions
Source: Royal Society of Chemistry journal article supplement (doi:10.1039/c5ra12258a), 2015-01-01

## Supporting Information

### Experiment

#### 1. The synthesis of sensor Fluorescein-Ad moiety

##### 1.1 The synthesis of S1 and S2

According to the literature [8], fluorescein (6 g, 18.1 mmol), 24 mL hydrazine hydrate (hydrazine content >80 mass %), 50ml MeOH were dropwised. The cude product was purified by recrystallization from MeCN to give 4.7g as an off-white solid (83%).

Adamantanecarboxylic-

acid(3.44g,19.1mmol),DMAP(0.192g,1.7mmol),EDCI(3.15g,17.1mmol),and 2,4-2 hydroxyl benzaldehyde (1.89g,13,7mmol) were dissolved into 50ml DMF.The residue was purified by flash chromatography with CH<sub>2</sub>Cl<sub>2</sub>/ PE(10:1) as the eluent to afford S2 (3.14g, yield: 75%) off-white solid.

##### 1.2 The synthesis of S3

S1 (1.048g,3,03mmol)and S2 (0.925g,3.08mmol) were dissolved in 100ml dry ethanol, and the reaction mixture was stirred under reflux and N<sub>2</sub>.Removing the solvent, the residue was purified by flash chromatography with CH<sub>2</sub>Cl<sub>2</sub>/MeOH,50:1 as the eluent to obtain light pink solid (1.14g,yield 60%).

<sup>1</sup>H NMR (400 MHz, DMSO) δ 10.55 (s, 1H), 9.94 (s, 2H), 9.08 (s, 1H), 7.91 (s, 1H), 7.62 (s, 2H), 7.36 (s, 1H), 7.12 (s, 1H), 6.93 – 6.25 (m, 8H), 1.86 (dd, *J* = 84.6, 23.0 Hz, 15H).

<sup>13</sup>C NMR (101 MHz, DMSO) δ 178.54 – 177.80 (m), 174.84 (s), 163.51 (s), 158.35 (d, *J* = 72.3 Hz), 157.98 – 157.25 (m), 153.25 (s), 152.10 (s), 150.57 (s), 148.87 (s), 134.23 – 133.81 (m), 129.28 (d,

$J = 20.3$  Hz), 128.58 (s), 128.02 (s), 123.51 (d,  $J = 55.2$  Hz), 116.93 (s), 112.88 (d,  $J = 70.0$  Hz), 112.31 – 111.32 (m), 109.51 (d,  $J = 18.9$  Hz), 102.55 (s), 65.15 (s), 54.91 (s), 40.41 (s), 38.49 (s), 38.09 (s), 35.91 (d,  $J = 24.7$  Hz), 27.31 (d,  $J = 16.7$  Hz).

ESI-MS (m/z): [M+H]<sup>+</sup> + calcd for C<sub>38</sub>H<sub>32</sub>N<sub>2</sub>O<sub>7</sub>, 629; found, 628.

## **2. Preparation of Fe<sub>3</sub>O<sub>4</sub>@SiO<sub>2</sub>-β-CD.**

### **2.1 preparation of magnetic microspheres**

According to the literature [4], 1.35g FeCl<sub>3</sub>·6H<sub>2</sub>O (5 mmol) was dissolved in 40mL glycol adding 3.6g NaAc and stirring for 30min. Then the mixture was put into high pressure reactor with 200°C for 12h. Cooling to indoor temperature, the product was washed by alcohol for 6 times, then vacuum drying at 60°C for 6h.

### **2.2 Preparation of magnetic silica microspheres**

0.5g above-mentioned magnetic microspheres, 2ml TEOS was mixed uniformly, dropwising 20ml H<sub>2</sub>O and emulsifying 1h with ultrasonic compulsively. After that, 6ml ammonia (25%) and 25ml ethanol were dropwised stirring for 4h at room temperature with ultrasonic. The product was obtained by centrifugation, washed with alcohol, then separated magnetically

### **2.3 Preparation of β-CD-SiO<sub>2</sub>@Fe<sub>3</sub>O<sub>4</sub>**

2.5gβ-CD was dissolved in 50ml DMF, then added 0.5g NaH stirring at room temperature. After 15min, the mixture was filtered to get colatuie in which we added 4ml GTMS(KH560) at 90°C under the protection of nitrogen. After 5h, 50ml DMF, 1g magnetic sillica microspheres and 1.5ml ammonia (25%) was added one by one stirring for 12h fiercely. The product was separated by magnet and washed with ethanol and water, then vacuum desiccated at 60°C for 24 h.

**Scheme S1.** The synthesis of sensor Fluorescein-Ad moiety S3

**Scheme S2.** The preparation of  $\text{Fe}_3\text{O}_4@\text{SiO}_2\text{-}\beta\text{-CD}$

**Fig.S1.** The SEM and TEM images (a, b) of FFIC MNPs

**Fig.S2a.** The magnetic hysteresis loops of  $\text{Fe}_3\text{O}_4$  (black line), FFIC MNPs (red line)

**Fig.S3a.**  $^1\text{H}$  NMR spectrum of organic molecule fluorophore moiety in DMSO- $d_6$

**Fig.S3b.**  $^{13}\text{C}$  NMR spectrum of organic molecule fluorophore moiety in DMSO- $d_6$

**Fig.S4.** X-ray powder diffraction pattern analysis

**Fig.S5.** Photograph of FFIC MNPs in the presence of various metal ions ( $5.0 \times 10^{-4}$  M except  $\text{Zn}^{2+}$  that is  $1.0 \times 10^{-5}$  M) in  $\text{CH}_3\text{CN-H}_2\text{O}$  (1:4, v/v, pH=7.10)

**Fig.S6.** The different pH, 0.1g/L FFIC MNPs,  $2.5 \times 10^{-6}$ mol/L  $\text{Zn}^{2+}$ , excitation was at 390 nm, emission was monitored at 485 nm. Slit 2.50×5.00mm

**Fig.S7.** From left to right was FFIC MNPs ( $\text{CH}_3\text{CN-H}_2\text{O}$ , 1: 4, and v/v, buffered at pH=7.1 with Tris-HCl) with no  $\text{Zn}^{2+}$ , 0.25 $\mu\text{mol/L}$ , 2.5 $\mu\text{mol/L}$ , 25 $\mu\text{mol/L}$ .

**Fig.S8.** The different volume proportion of  $\text{CH}_3\text{CN}$  and water, 0.1g/L FFIC MNPs,  $5 \times 10^{-6}$ mol/L  $\text{Zn}^{2+}$  in 4ml, excitation was at 390 nm, emission was monitored at 485 nm. Slit 2.50×5.00mm

**Fig.S9.** S3 and  $\text{Zn}^{2+}$  in  $\text{CH}_3\text{CN-H}_2\text{O}$  (1/4, v/v), conditions:[S3 +  $\text{Zn}^{2+}$ ] =  $2.5 \times 10^{-5}$  mol/L, excitation was at 390 nm, emission was monitored at 485nm.

**Fig.S10.** Time course of fluorescence intensity of FFIC MNPs (0.1 g/L), the concentration of  $\text{Zn}^{2+}$   $2.5 \times 10^{-7}$  ( $\text{CH}_3\text{CN-H}_2\text{O}$ , 1:4, v/v) buffered at pH=7.1 with tris-HCl(0.1M), excitation was at 390 nm, emission was monitored at 485nm)

**Fig.S11.** The equilibrium adsorption amounts

**Fig.S12.** The Langmuir curve

Fig.S1

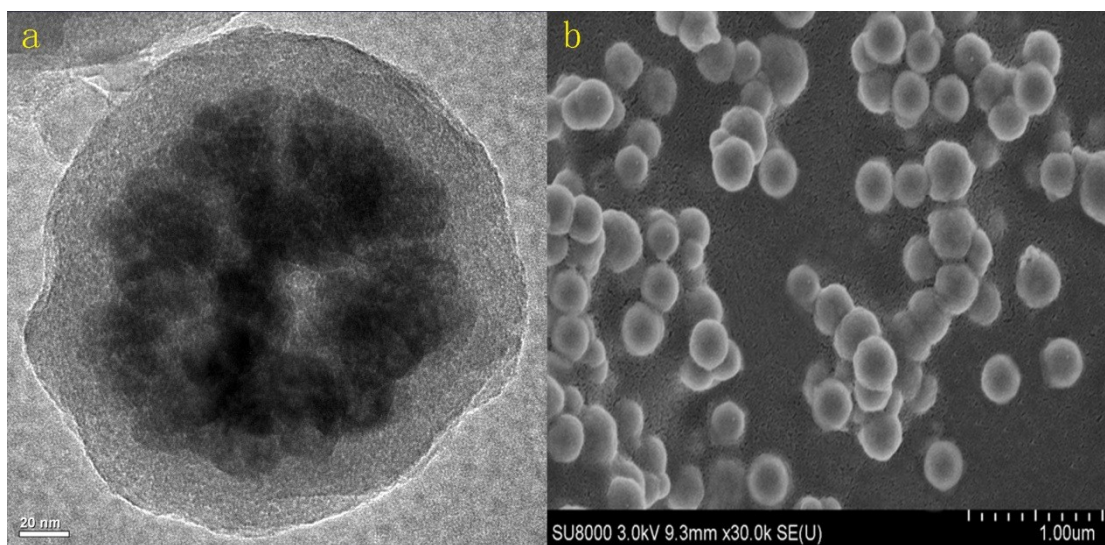

Fig.S2a

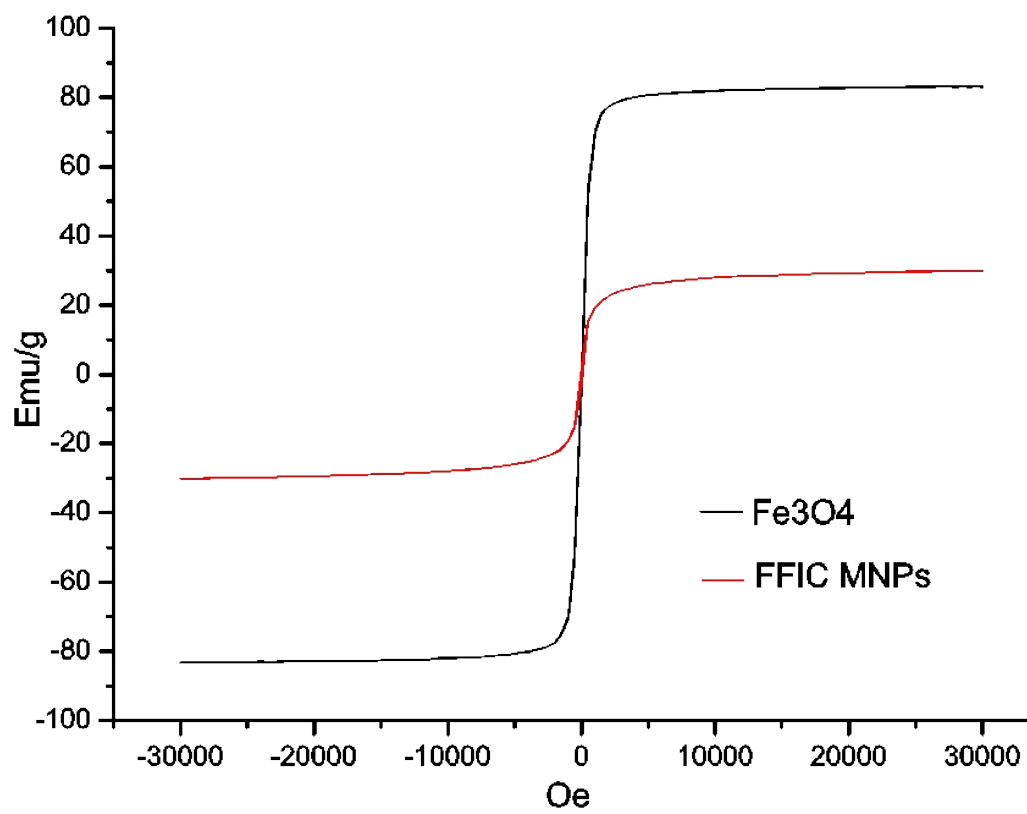

Fig.S2b

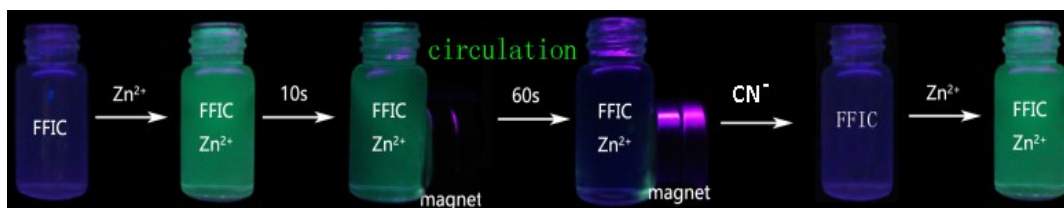

Fig.S3a

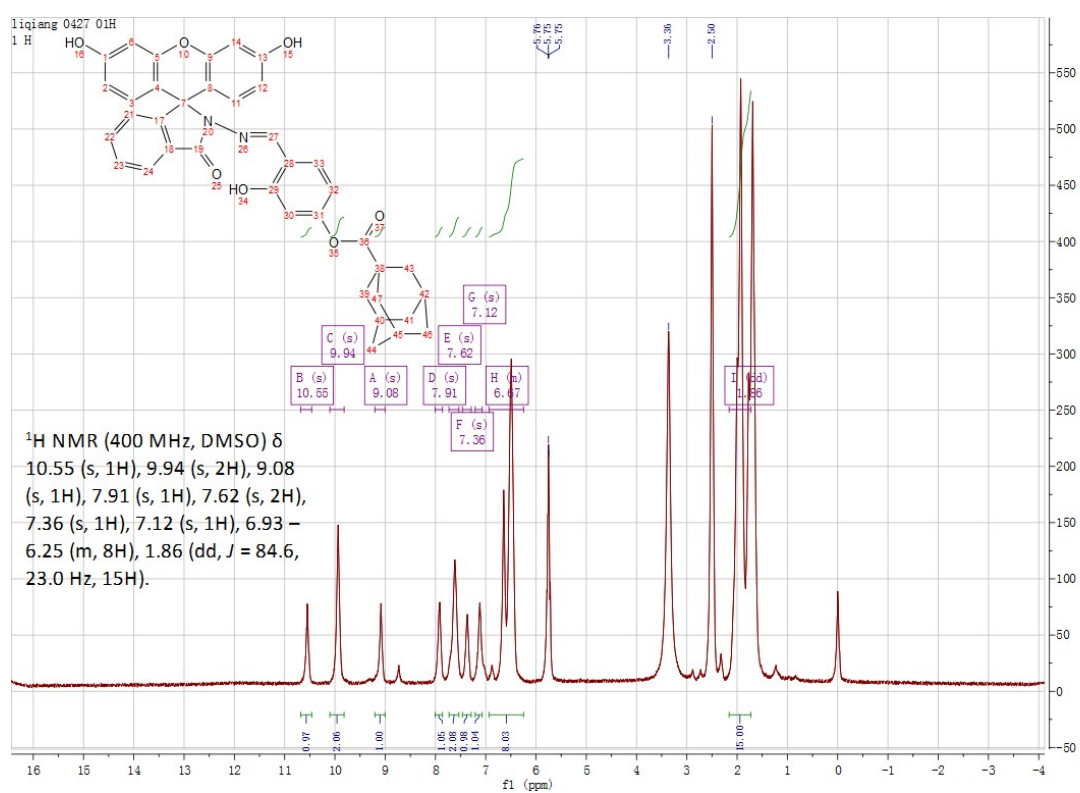

Fig.S3b

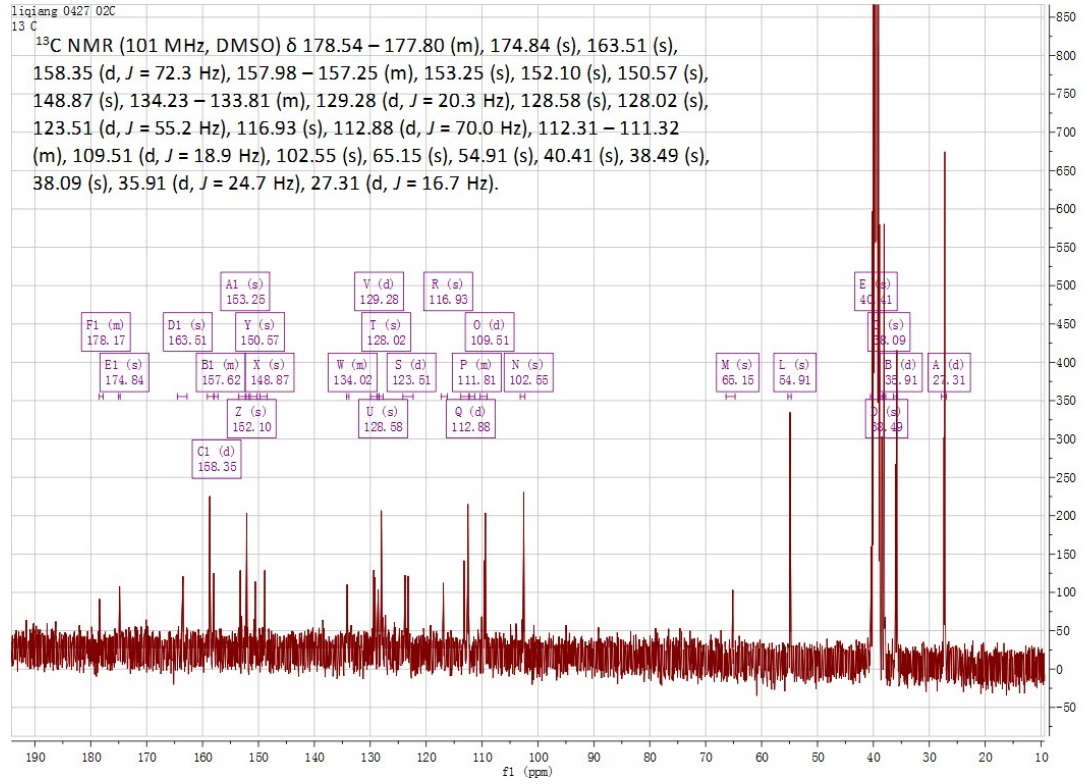

Fig.S4

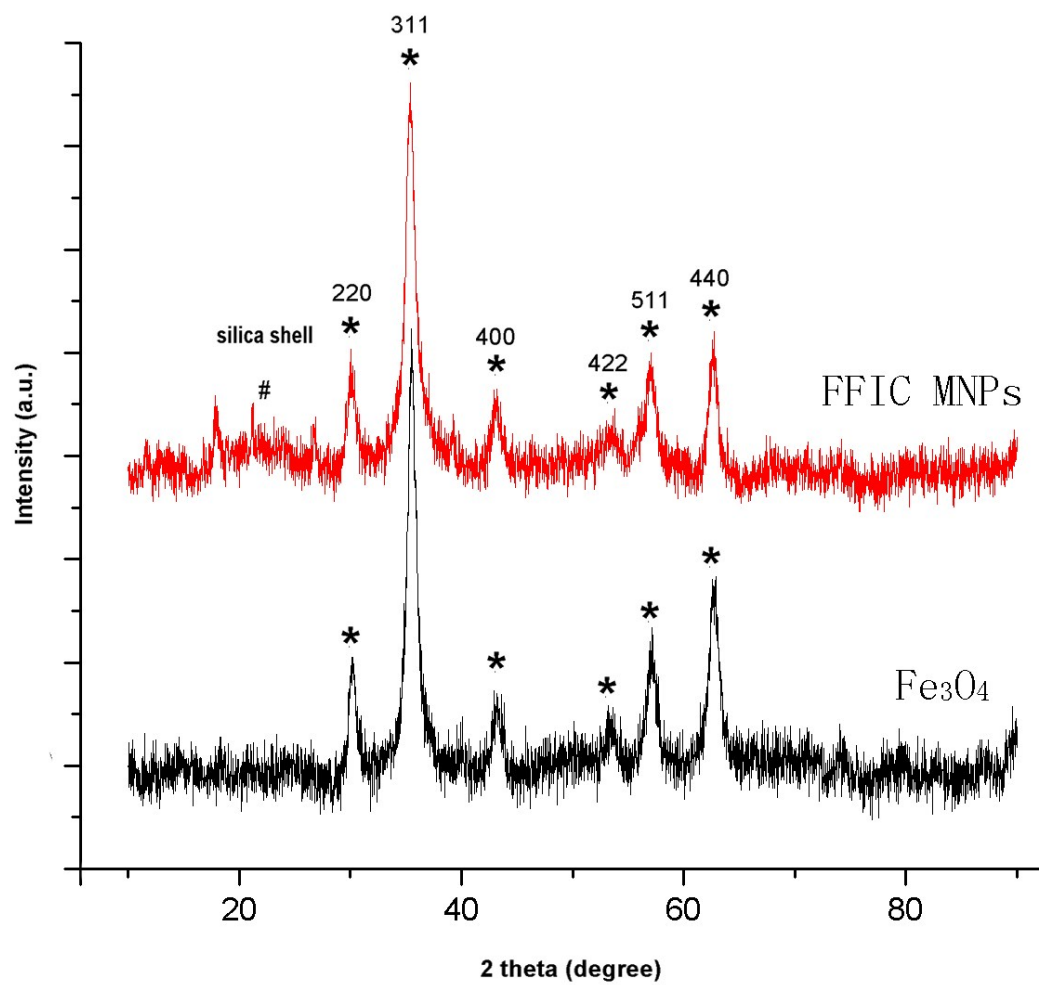

Fig.S5

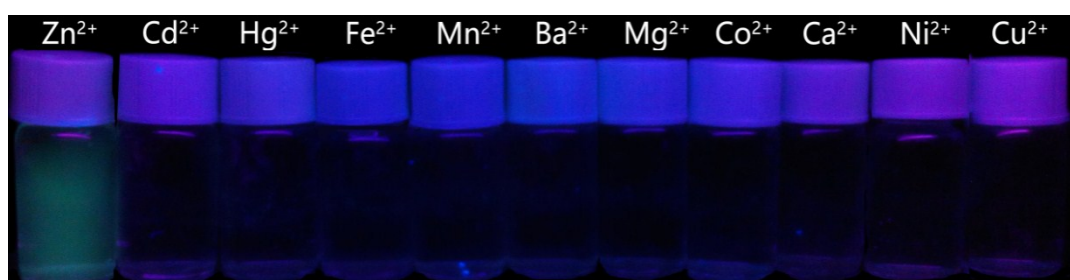

Fig.S6

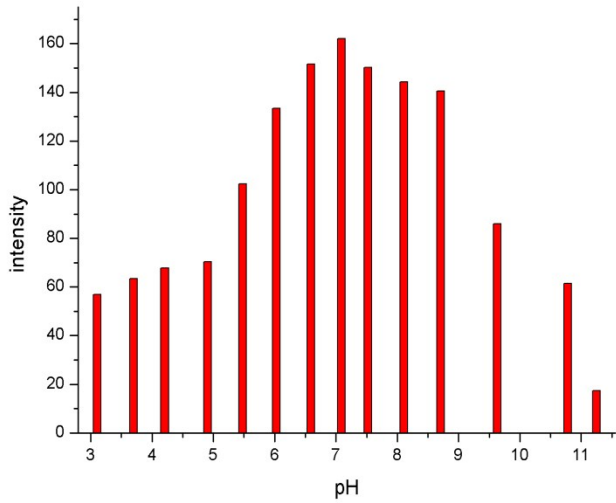

Fig.S7

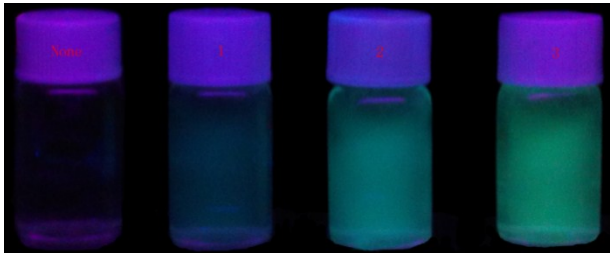



Fig.S8

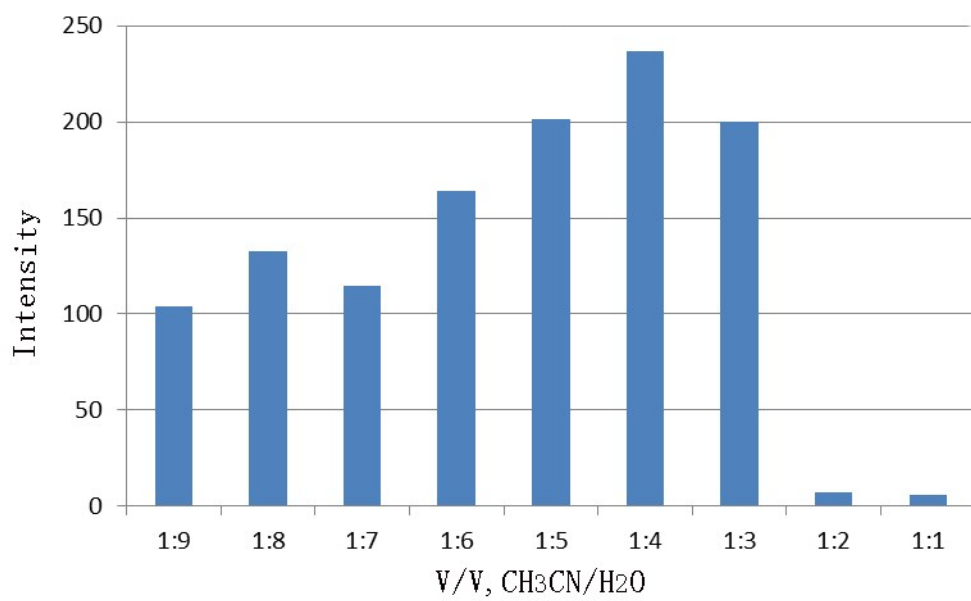

Fig.S9

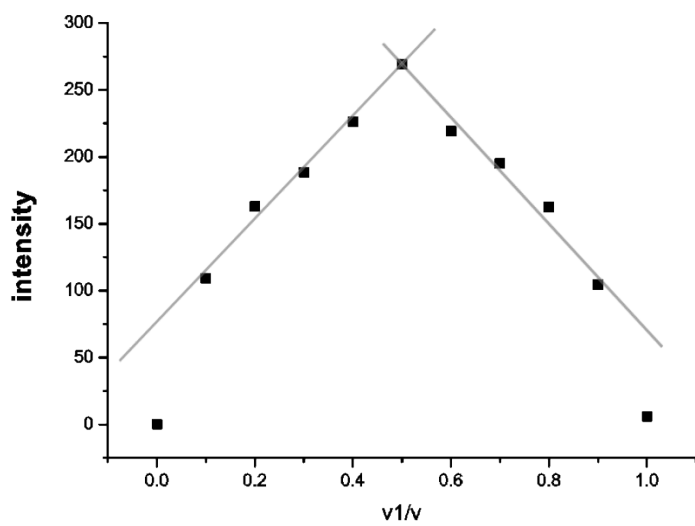

Fig.S10

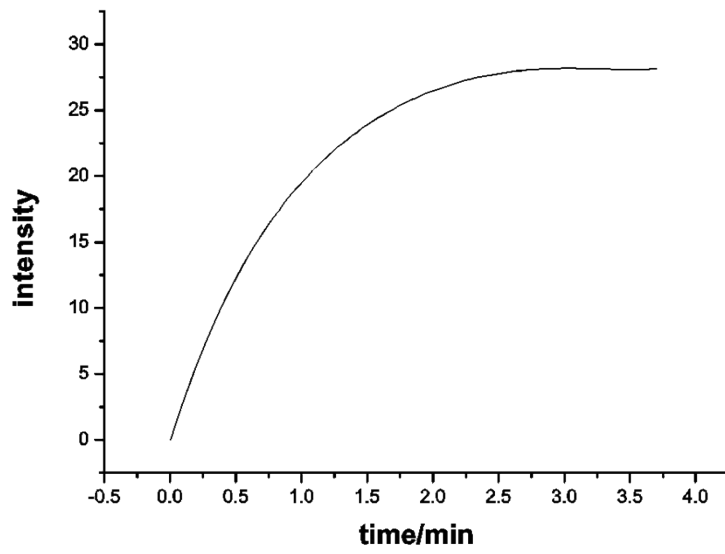

Fig.S11

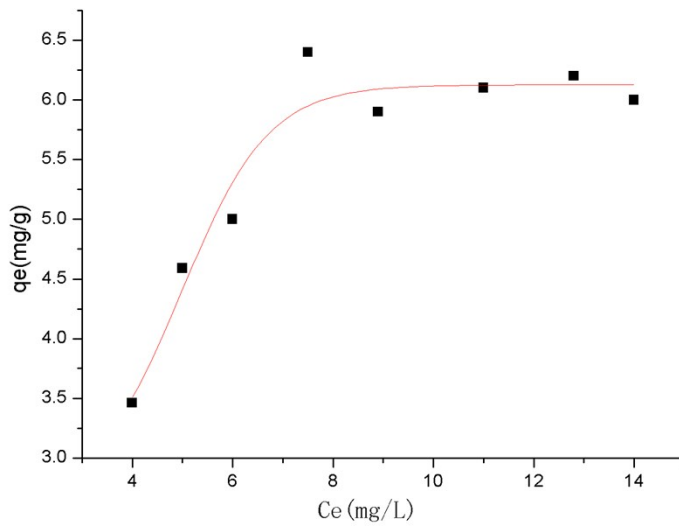

Fig.S12

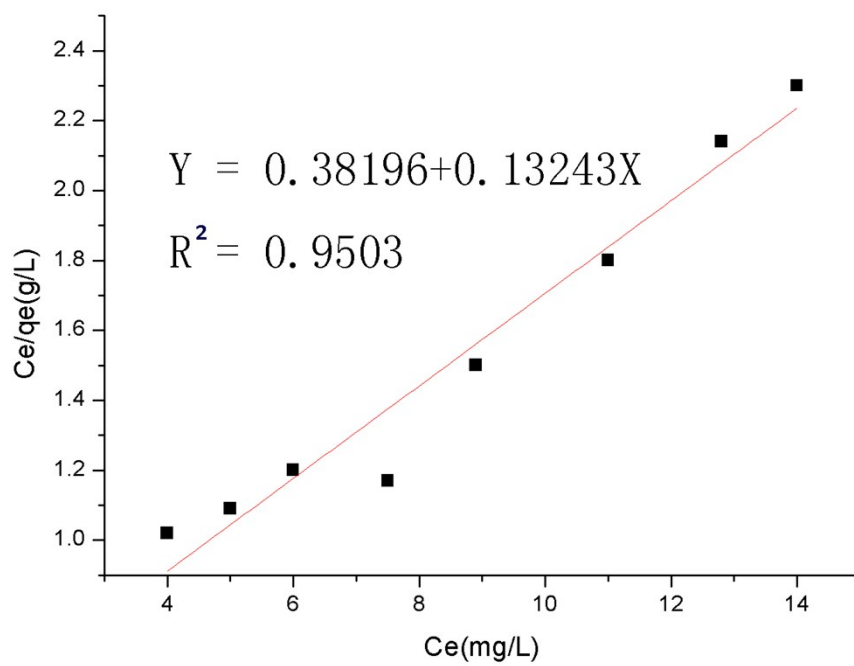

Scheme S1

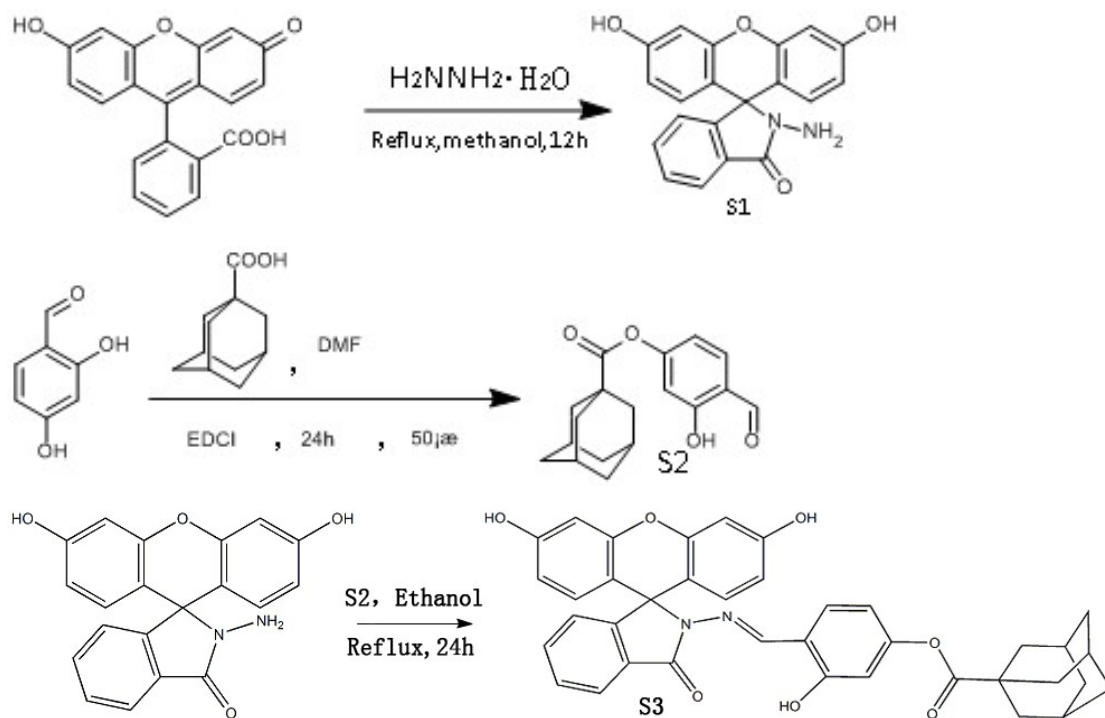

Scheme S2

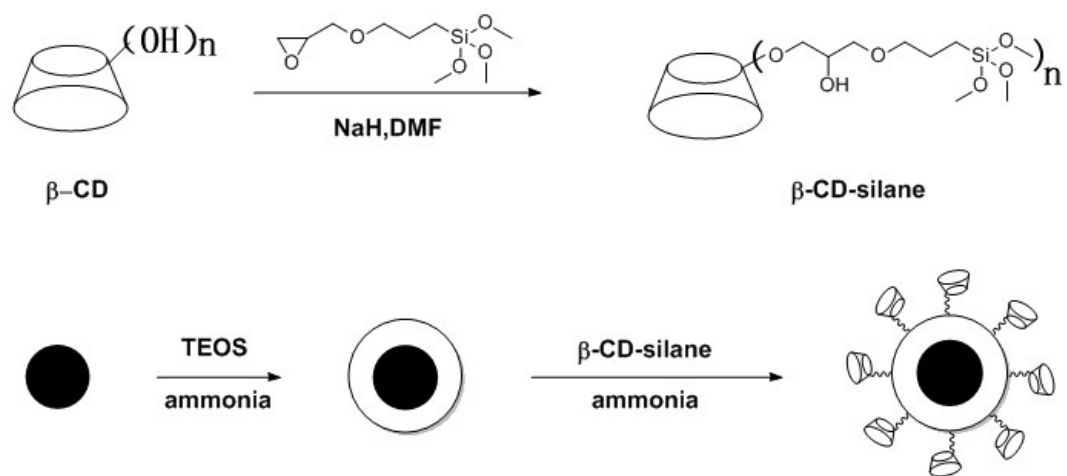

Supplement: c5ra12258a1.pdf [file c5ra12258a1.pdf]
